# Supplementary material for: Differential proteomic analysis of fetal and geriatric lumbar nucleus pulposus: immunoinflammation and age-related intervertebral disc degeneration
Source: PubMed Central journal article supplement (PMC7265631; doi:10.1186/s12891-020-03329-8), 2020-06-02
Supplement: 12891_2020_3329_MOESM2_ESM.pdf [file 12891_2020_3329_MOESM2_ESM.pdf]

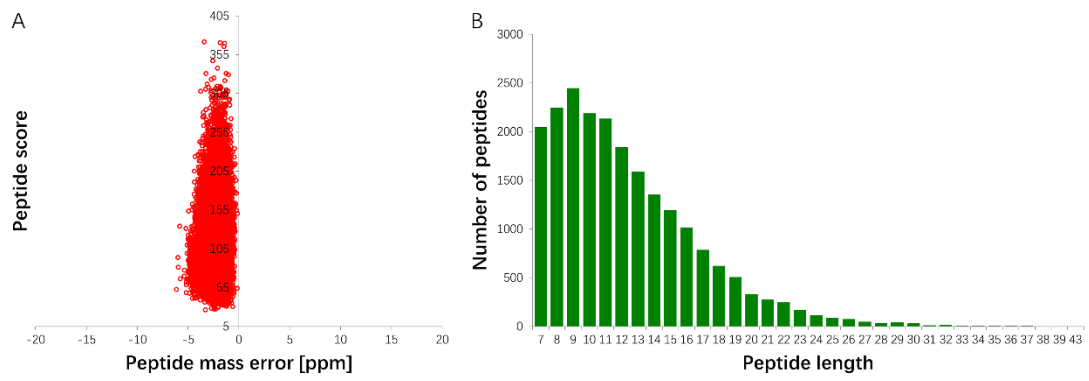

Figure. Peptide mass error and peptide length. (A) All the identified peptides were examined by mass error distribution. The mass errors were concentrated in the range below 5 ppm, indicating that they met the requirements. (B) The lengths of most peptides were between 8 and 20 amino acids, consistent with the typical lengths of trypsin-digested peptides and indicating that the sample preparation method met the standard.
